# Supplementary material for: Boosting the comprehensive performance for a Co-free high-voltage system with a multi-component nitrile
Source: Royal Society of Chemistry journal article supplement (doi:10.1039/d1nj04080d), 2021-01-01
Supplement: d1nj04080d1.pdf [file d1nj04080d1.pdf]

## Supplementary Materials

### **Boosting comprehensive performance for Co-free high-voltage system with multi-component nitrile**

Ping Zhang<sup>a</sup>, Shiyou Li<sup>b</sup>, Xiaohong Wei<sup>a</sup>, Chunlei Li<sup>b</sup>, Shujuan Meng<sup>a</sup>,

Xiaoling Cui<sup>b</sup>, Dongni Zhao<sup>b\*</sup>

<sup>a</sup> *Chemical Engineering Institute, Northwest Minzu University, Lanzhou, 730030, P. R. China*

<sup>b</sup> *College of Petrochemical Technology, Lanzhou University of Technology, Lanzhou 730050, P.R. China*

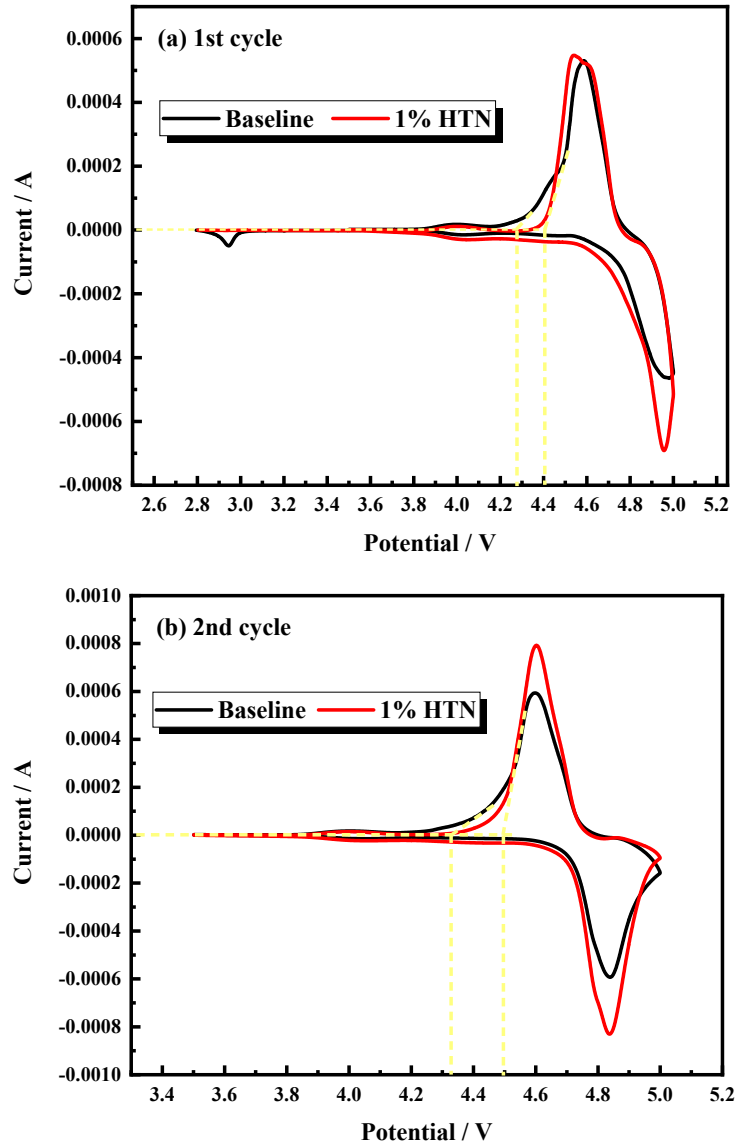

Figure S1 Cyclic voltammetry curve of Baseline and 1% HTN electrolytes: (a) First cycle; (b) second cycle.

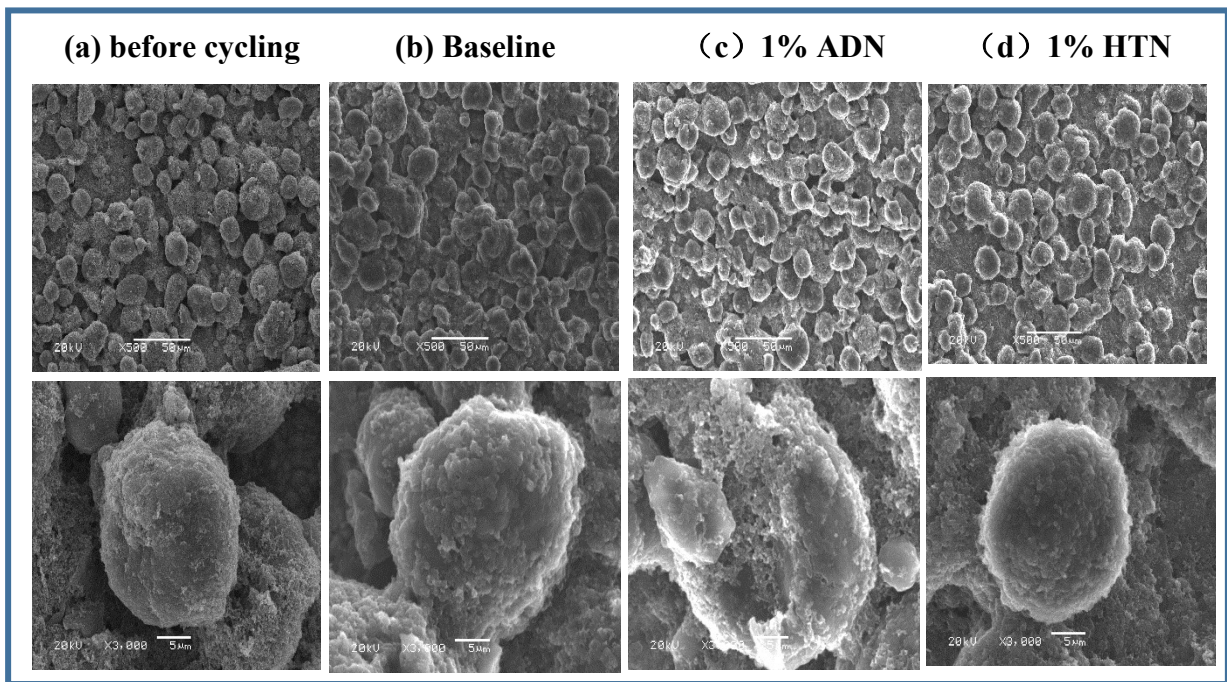

**Figure S2 Surface morphology of the MCMB electrode after the first discharge in different electrolyte systems (a) Before not cycling; (b) Baseline; (c) 1% ADN; (d) 1% HTN**
